# Supplementary material for: High-performance flexible oxide TFTs: optimization of a-IGZO film by modulating the voltage waveform of pulse DC magnetron sputtering without post treatment
Source: Royal Society of Chemistry journal article supplement (doi:10.1039/c7tc04970f), 2018-01-01
Supplement: c7tc04970f1.pdf [file c7tc04970f1.pdf]

## Supporting Information

### High-Performance Flexible Oxide TFTs: Optimization of a-IGZO Film by Modulating Voltage Waveform of Pulse DC Magnetron Sputtering without Post Treatments

*Rihui Yao,<sup>a</sup> Zeke Zheng,<sup>a</sup> Zhiqiang Fang,<sup>\*,a</sup> Hongke Zhang,<sup>a</sup> Xiaochen Zhang,<sup>a</sup> Honglong Ning,<sup>\*,a</sup> Lei Wang,<sup>a</sup> Junbiao Peng,<sup>\*,a</sup> Weiguang Xie,<sup>b</sup> and Xubing Lu<sup>c</sup>*

<sup>a</sup> Institute of Polymer Optoelectronic Materials and Devices, State Key Laboratory of Luminescent Materials and Devices, South China University of Technology, Guangzhou 510640, China;

<sup>b</sup> Siyuan Laboratory, Guangzhou Key Laboratory of Vacuum Coating Technologies and New Energy Materials, Department of Physics and Department of Electronic Engineering, Jinan University, Guangzhou 510632, China;

<sup>c</sup> Institute for Advanced Materials and Guangdong Provincial Key Laboratory of Quantum Engineering and Quantum Materials, South China Normal University, Guangzhou 510006, China.

\*E-mail: [fangzq1230@gmail.com](mailto:fangzq1230@gmail.com) (Z.F.),  
[ninghl@scut.edu.cn](mailto:ninghl@scut.edu.cn) (H.N.),  
[psjbpeng@scut.edu.cn](mailto:psjbpeng@scut.edu.cn) (J.P.)

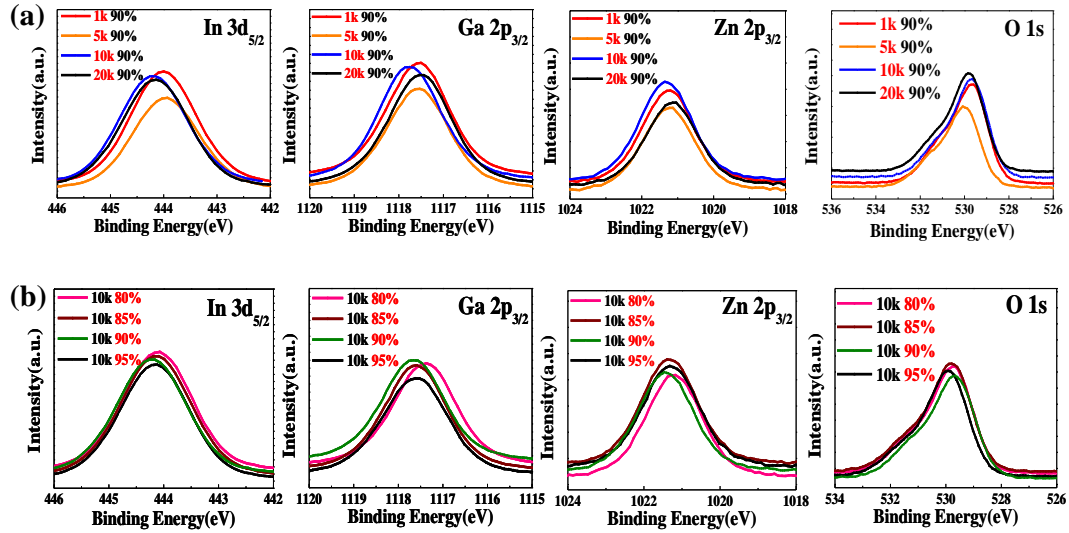

**Figure.S1** The In 3d<sub>5/2</sub>, Ga 2p<sub>3/2</sub>, Zn 2p<sub>3/2</sub> and O 1s core level XPS spectra for 50 nm-thick IGZO films sputtered by the modulated waveform with varying (a) frequency and (b) duty cycles

**Table.S1** The electrical properties of a-IGZO TFTs and the corresponding IGZO films' density.

| Frequency/<br>Duty Cycle | Mobility<br>(cm <sup>2</sup> V <sup>-1</sup> s <sup>-1</sup> ) | I <sub>on</sub> /I <sub>off</sub> | SS<br>(V dec <sup>-1</sup> ) | V <sub>on</sub><br>(V) | Density<br>(g/cm <sup>3</sup> ) |
|--------------------------|----------------------------------------------------------------|-----------------------------------|------------------------------|------------------------|---------------------------------|
| 1kHz/80%                 | 1.2                                                            | 1.1x10 <sup>6</sup>               | 0.70                         | 9.1                    | 5.80                            |
| 1kHz/85%                 | 2.4                                                            | 7.9x10 <sup>6</sup>               | 0.67                         | 5.4                    | 5.92                            |
| 1kHz/90%                 | 5.6                                                            | 2.5x10 <sup>7</sup>               | 0.51                         | 3.5                    | 5.99                            |
| 1kHz/95%                 | 15.9                                                           | 9.8x10 <sup>7</sup>               | 0.61                         | -0.3                   | 6.12                            |
| 5kHz/80%                 | 3.5                                                            | 9.5x10 <sup>6</sup>               | 0.49                         | 9.3                    | 5.88                            |
| 5kHz/85%                 | 3.3                                                            | 6.7x10 <sup>6</sup>               | 0.53                         | 9.6                    | 5.92                            |
| 5kHz/90%                 | 8.3                                                            | 8.1x10 <sup>7</sup>               | 0.42                         | 5.4                    | 5.96                            |
| 5kHz/95%                 | 18.1                                                           | 1.1x10 <sup>8</sup>               | 0.38                         | 1.5                    | 6.17                            |
| 10kHz/80%                | 13.3                                                           | 2.1x10 <sup>8</sup>               | 0.48                         | 0.7                    | 6.06                            |
| 10kHz/85%                | 11.3                                                           | 1.3x10 <sup>8</sup>               | 0.61                         | -2.9                   | 6.08                            |
| 10kHz/90%                | 25.8                                                           | 4.1x10 <sup>8</sup>               | 0.44                         | -2.6                   | 6.17                            |
| 10kHz/95%                | 3.9                                                            | 9.7x10 <sup>6</sup>               | 0.42                         | 3.2                    | 6.23                            |
| 20kHz/80%                | 11.8                                                           | 9.0x10 <sup>6</sup>               | 0.88                         | 3.9                    | 6.05                            |
| 20kHz/85%                | 13.5                                                           | 1.5x10 <sup>7</sup>               | 0.56                         | 5.7                    | 6.08                            |
| 20kHz/90%                | 14.4                                                           | 2.0x10 <sup>7</sup>               | 0.79                         | 4.1                    | 6.20                            |
| 20kHz/95%                | 12.8                                                           | 2.2x10 <sup>7</sup>               | 0.52                         | 4.5                    | 6.32                            |

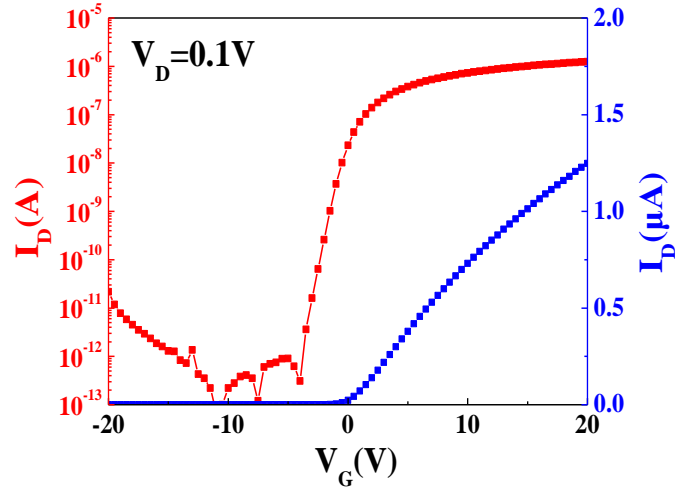

**Figure.S2** The transfer characteristic curve with drain voltage of 0.1 V of the flexible IGZO TFT on PI substrate.

The transfer characteristic curve with drain voltage of 0.1 V of the flexible IGZO TFT on PI substrate fabricated by optimal conditions ( $f=10$  kHz,  $\gamma=90\%$ ) is shown in **Figure.S2**. The linear mobility ( $\mu_{lin}$ ) is extracted by the formula:

$$\mu_{lin} = \frac{\left( \frac{d I_D}{d V_G} \right)}{V_D C_i \left( \frac{W}{L} \right)}$$

where  $C_i = 38$  nF/cm<sup>2</sup> and  $W/L = 500/100$   $\mu\text{m}$   $\mu\text{m}^{-1}$ . The  $\mu_{lin}$  of the flexible IGZO TFT with drain voltage of 0.1 V is  $13.1$  cm<sup>2</sup> V<sup>-1</sup> s<sup>-1</sup>, which is lower than the  $\mu_{sat}$ , ( $20.9$  cm<sup>2</sup> V<sup>-1</sup> s<sup>-1</sup>). It can be due to the existence of 3-nm-thick Al<sub>2</sub>O<sub>3</sub> passivation layer between the electrodes and channel, which requires a certain voltage potential for an efficient tunneling effect to drive electrons to form high-flux current flow along the channel layer.
